# Supplementary material for: Calorimetry of phase transitions in liquid crystal 8CB under shear flow
Source: Royal Society of Chemistry journal article supplement (doi:10.1039/d2sm01652d), 2023-01-01
Supplement: d2sm01652d1.pdf [file d2sm01652d1.pdf]

Supporting Information

Calorimetry of phase transitions in liquid crystal 8CB under shear flow

Taro Yamamoto, Yuki Nagae, Tomonari Wakabayashi, Tadashi Kamiyama, Hal Suzuki\*

*Department of Chemistry, Kindai University, Higashiosaka, Osaka 577-8502, Japan*

\* E-mail: [h\\_suzuki@chem.kindai.ac.jp](mailto:h_suzuki@chem.kindai.ac.jp)

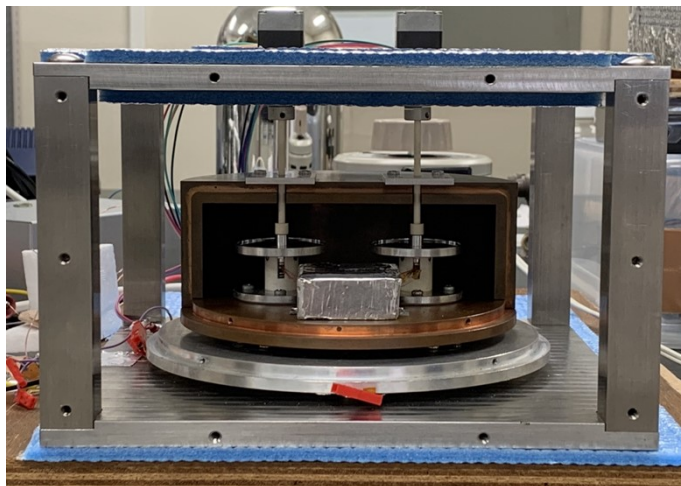

Figure S1 A photograph of the developed DSC equipped with a shearing system.

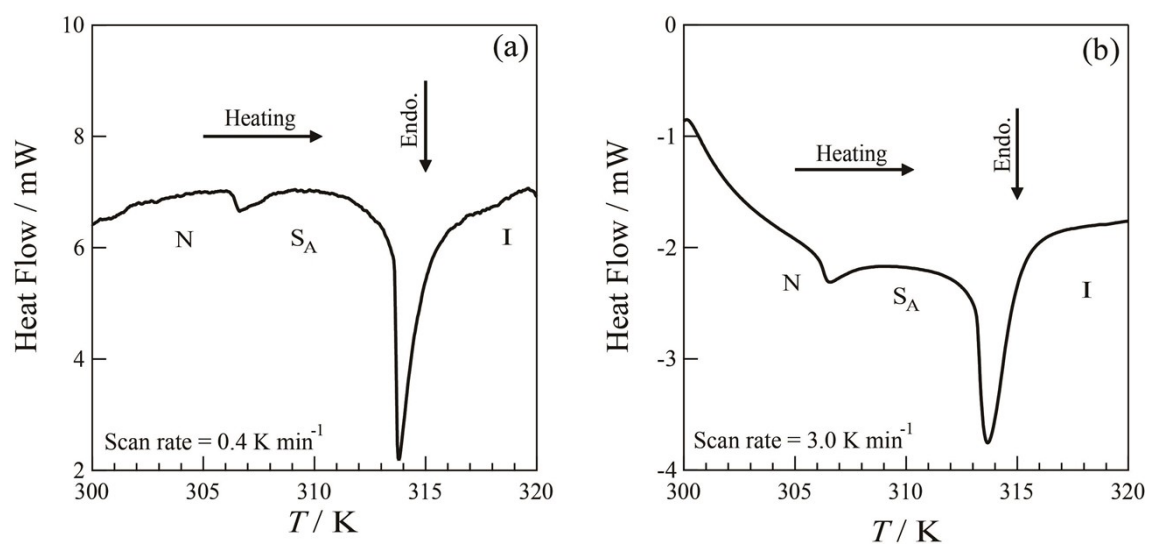

Figure S2 DSC curves of 8CB without shear flow (a) obtained by the developed calorimeter and (b) by a commercial DSC (Rigaku DSC8230).

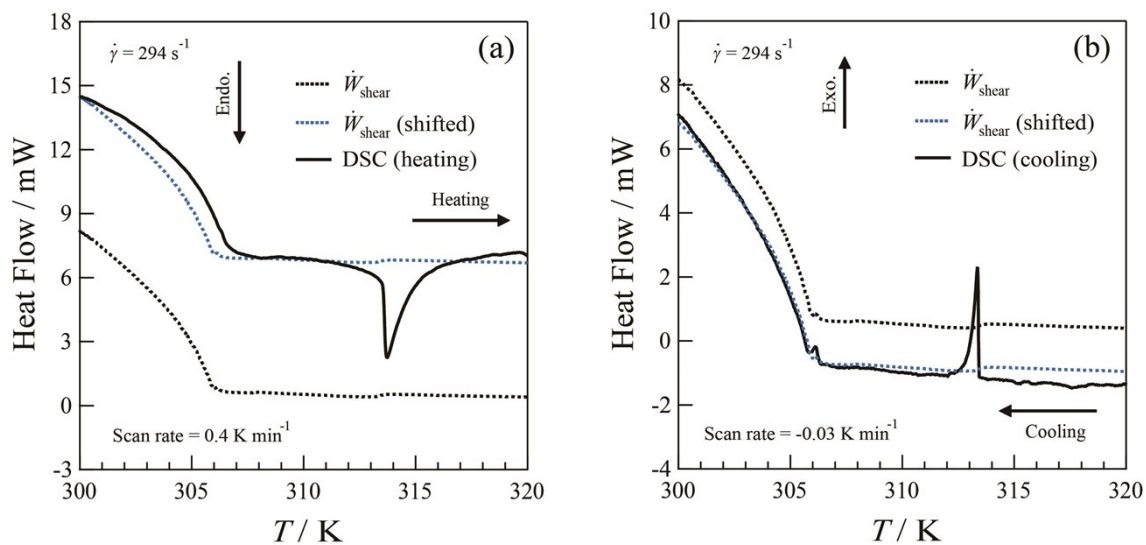

Figure S3 Comparison of  $\dot{W}_{shear}$  and the DSC curve in the (a) cooling and (b) heating scan. The blue dotted curves are the  $\dot{W}_{shear}$  vertically shifted.

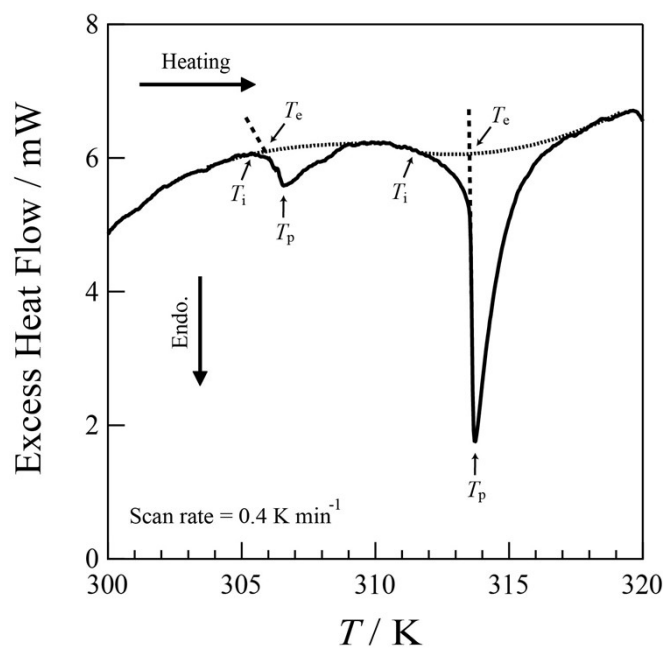

Figure S4 Demonstration of the three ways to determine the transition temperatures; the initiation temperature of the peak ( $T_i$ ), the extrapolation start temperature ( $T_e$ ), and the peak top temperature ( $T_p$ ).

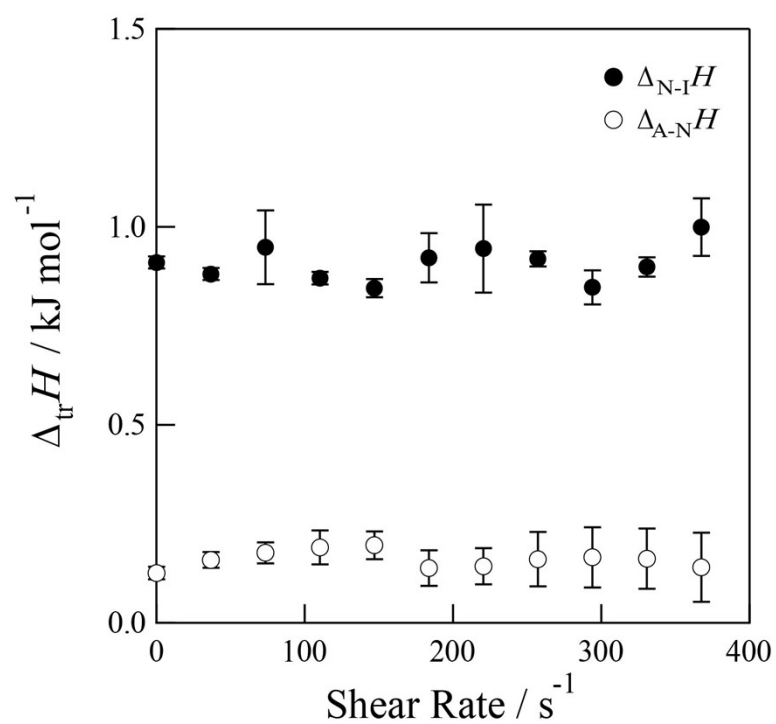

Figure S5 Enthalpy changes at the N-I ( $\Delta_{N-I}H$ , filled circles) and  $S_A$ -N transitions ( $\Delta_{A-N}H$ , unfilled circles) at various shear rates.
